# Supplementary material for: Harnessing thorium(iv) as a catalyst: RNA and phosphate diester cleavage by a thorium(iv) macrocyclic complex
Source: Royal Society of Chemistry journal article supplement (doi:10.1039/b005866l), 2000-01-01

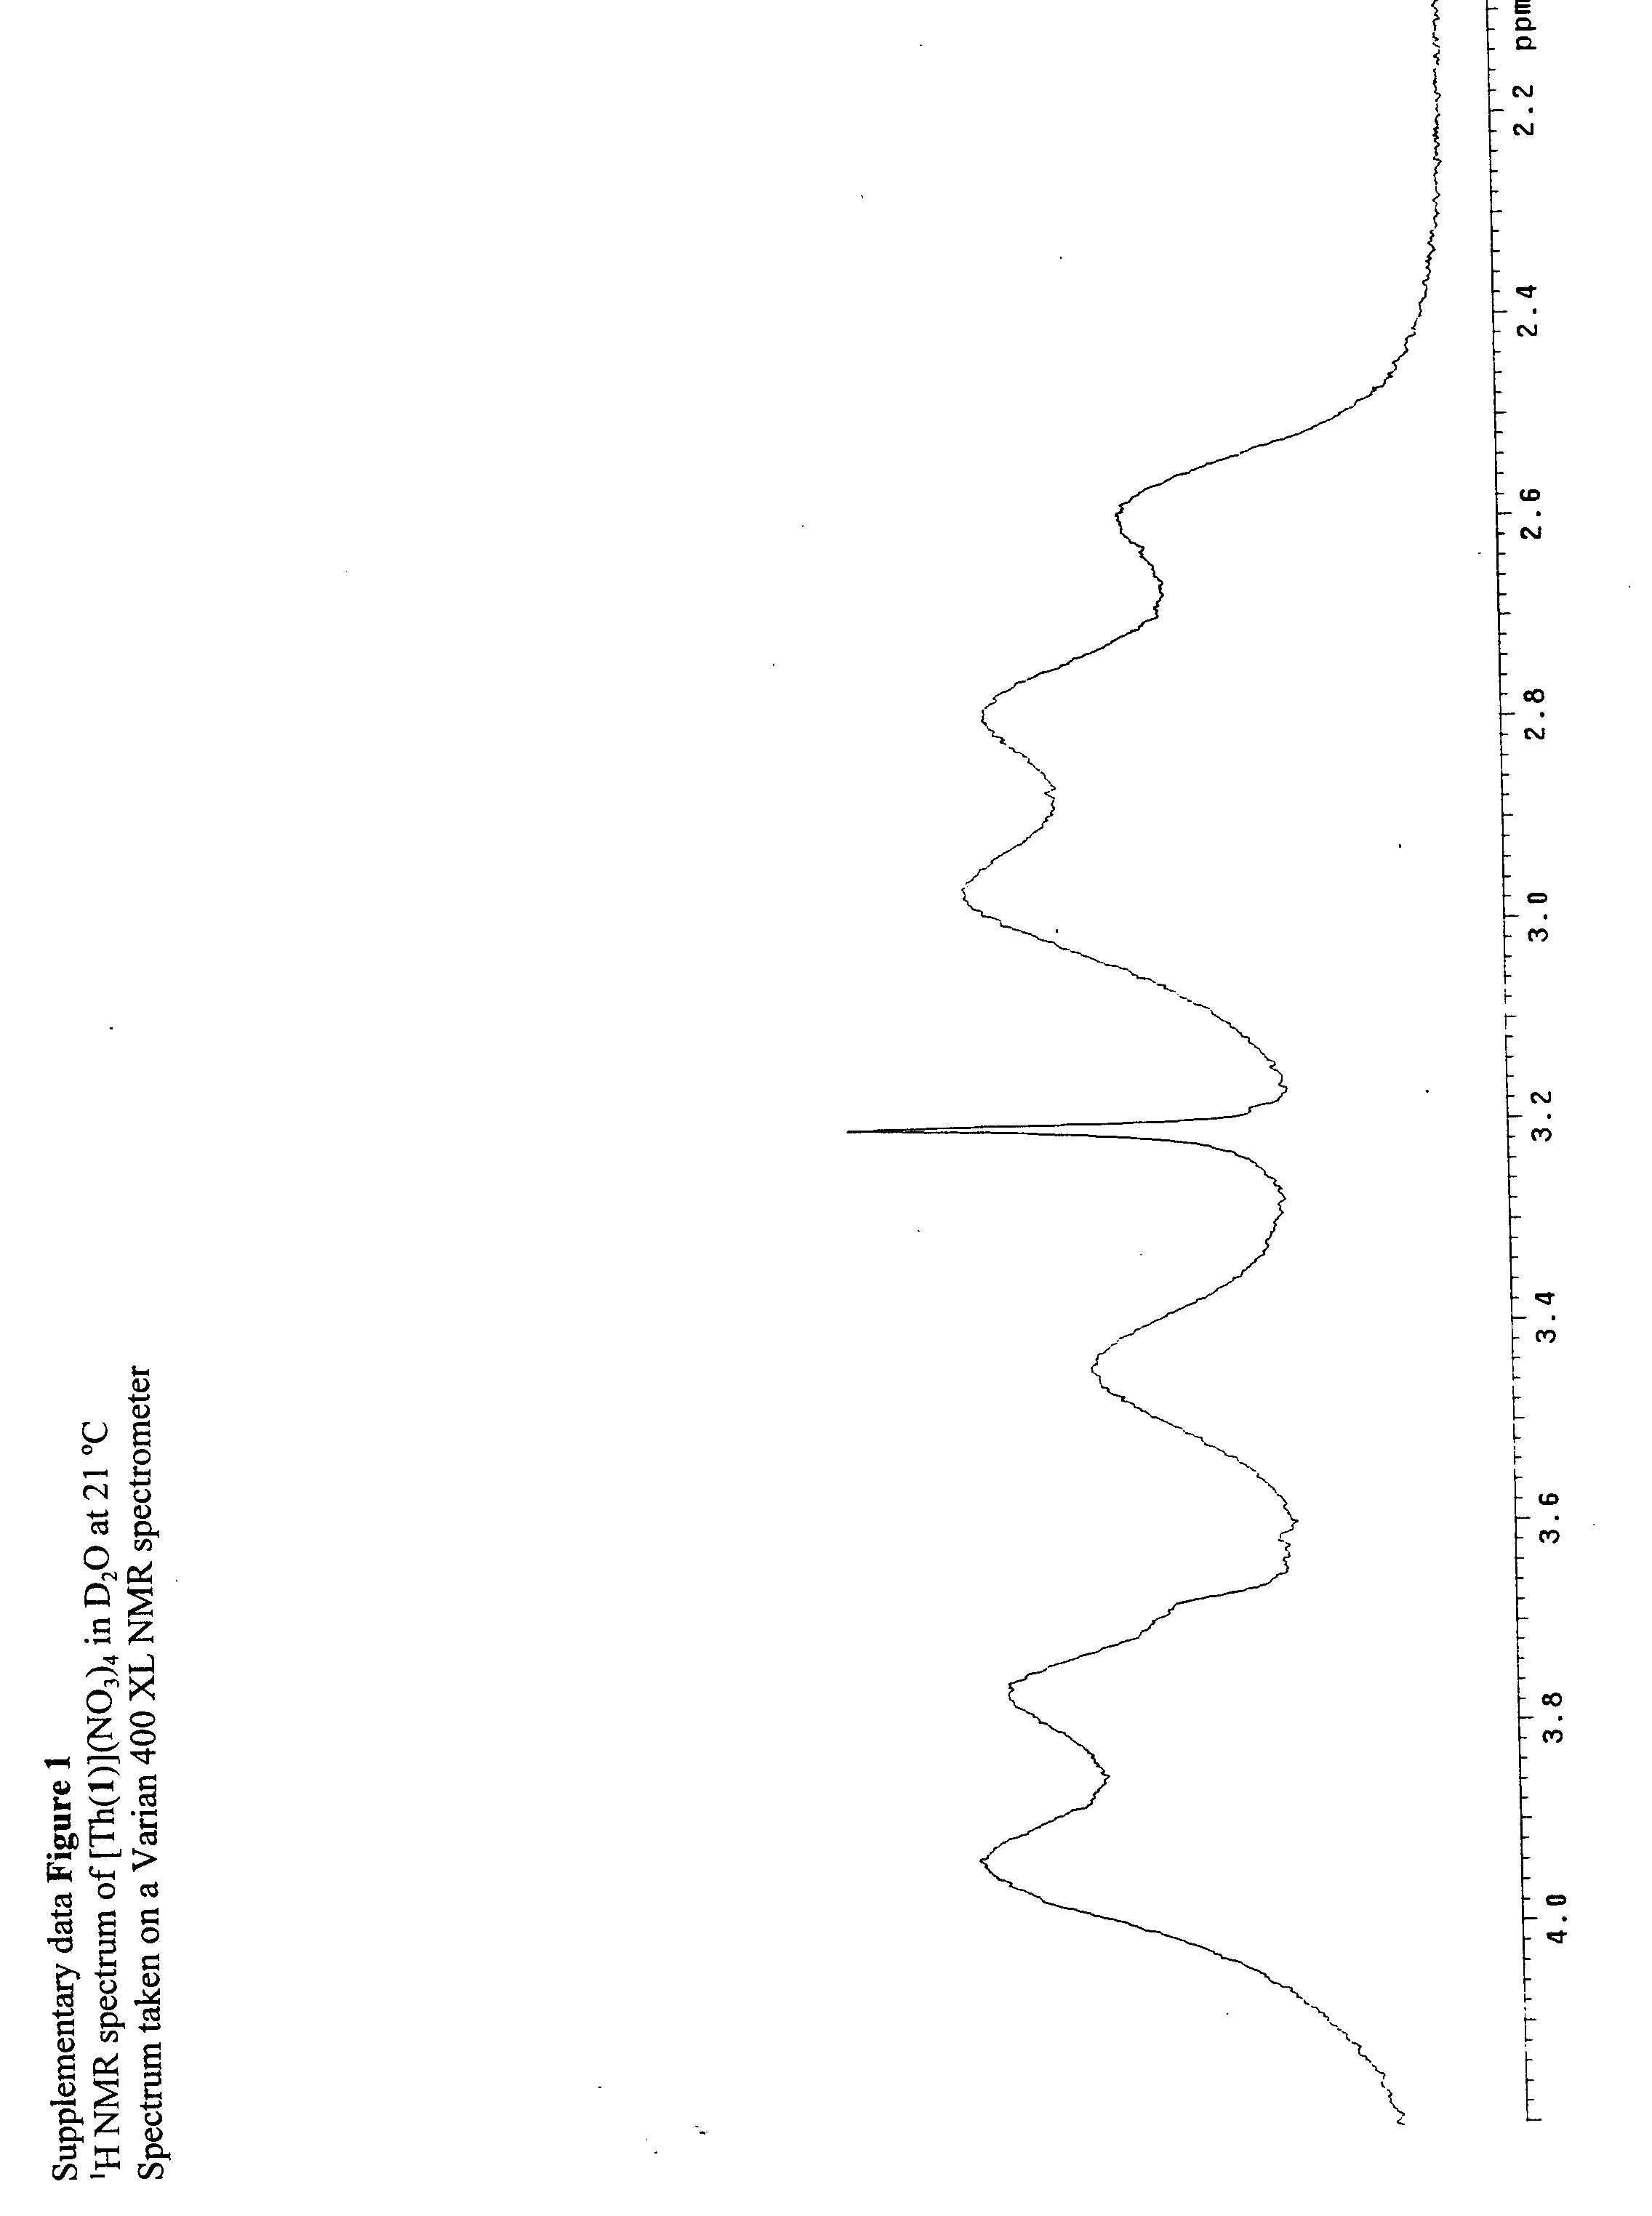
Supplementary data for: Harnessing Thorium(IV) as a catalyst: RNA and phosphate diester cleavage by a thorium(IV) macrocyclic complex. C. Wang, S. Choudhary, C.B. Vink, E. Scord and J.R. Morrow


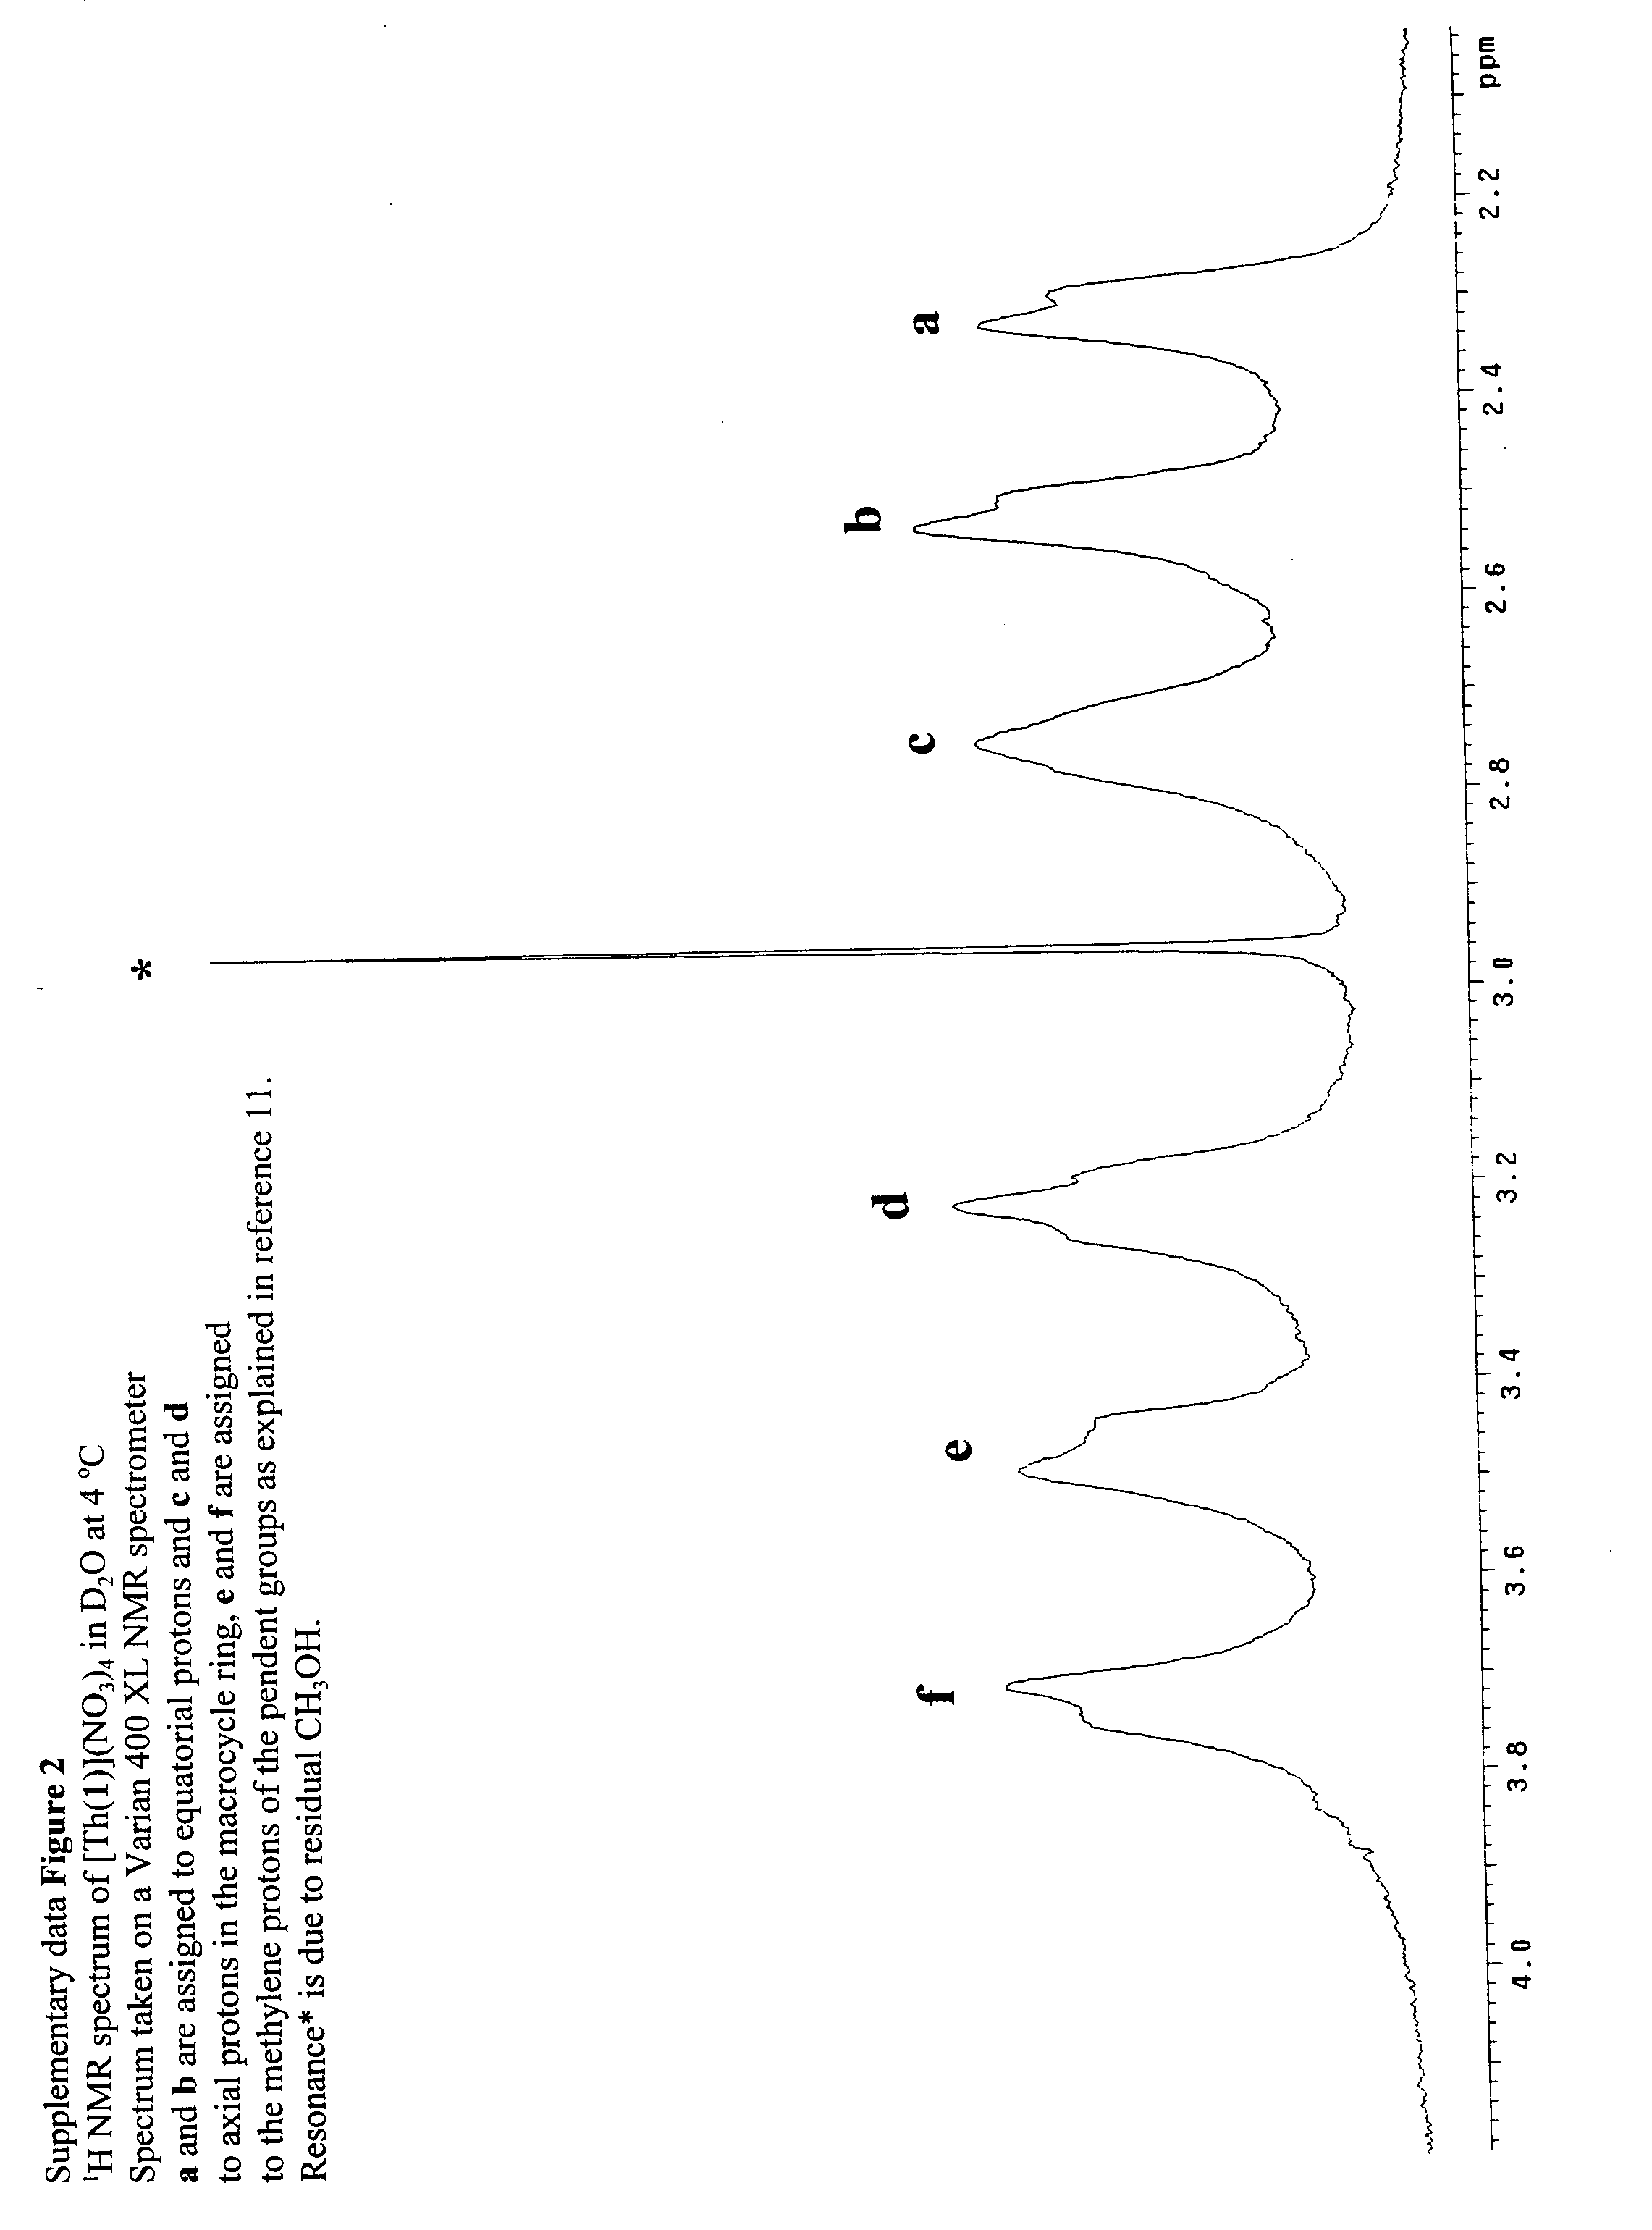

Supplement: b005866l.doc [file b005866l.doc]
